# Supplementary material for: Mitochondrial and nuclear DNA dual damage induced by 2-(2′-quinolyl)benzimidazole copper complexes with potential anticancer activity
Source: Royal Society of Chemistry journal article supplement (doi:10.1039/c7ra09102h), 2017-01-01
Supplement: c7ra09102h1.pdf [file c7ra09102h1.pdf]

## Supporting Information:

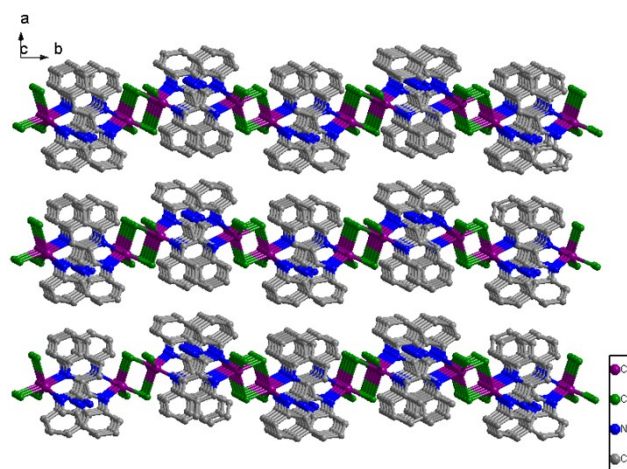

**Figure S1** The 3D supramolecular structure of compound **1** stabilized by hydrogen bonds and  $\pi$ - $\pi$  interactions (all hydrogen atoms are omitted for clarity).

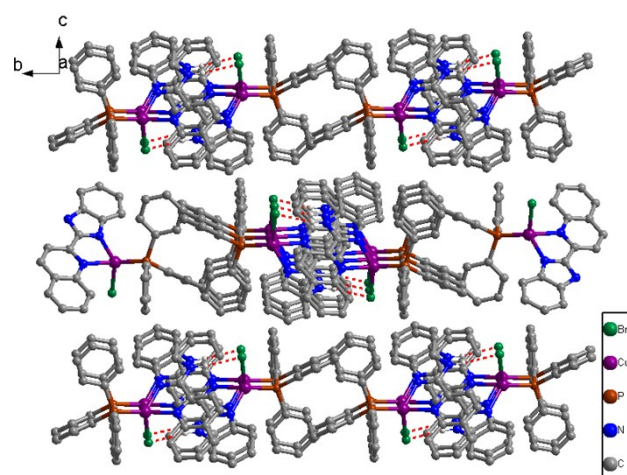

**Figure S2** The 3D supramolecular structure of compound **2** stabilized by hydrogen bonds and  $\pi$ - $\pi$  interactions.

**Table S1** HCT116 cells were treated with **1** and **2** at 37 °C for 12 h. Cellular uptake data of Cu in  $10^6$  tumor cells obtained from three independent measurements for each experiment.

| Complex          | Cu content (ng)  |
|------------------|------------------|
| Control          | $17.19 \pm 0.13$ |
| Complex <b>1</b> | $89.73 \pm 0.23$ |
| Complex <b>2</b> | $57.33 \pm 0.92$ |

**Table S2** HCT116 cells were treated with **1** and **2** at 37 °C for 12 h. Copper content in nucleus, mitochondria and cytoplasm of 10<sup>6</sup> cells were obtained from three independent measurements for each experiment.

| Complex          | Cu content (ng) |                    |                 |
|------------------|-----------------|--------------------|-----------------|
|                  | Cu in nucleus   | Cu in mitochondria | Cu in cytoplasm |
| Control          | 8.47 ± 0.14     | 8.04 ± 0.18        | 2.18 ± 0.10     |
| Complex <b>1</b> | 47.60 ± 0.40    | 12.67 ± 0.20       | 39.08 ± 0.17    |
| Complex <b>2</b> | 22.13 ± 0.22    | 16.43 ± 0.10       | 26.65 ± 0.13    |

**Table S3** Inhibitory effects of NAC plus **2** on cell viability in HCT116 cells. Cells were treated with NAC (10 mM) for 1 h and then incubated with **2** (5 and 10 μM) for 24 h, and cell viability was obtained by the MTT assay.

| Compounds                              | Cell viability(% of control) |
|----------------------------------------|------------------------------|
| NAC (10 mM)                            | 98.41 ± 1.40                 |
| NAC (10 mM) + Complex <b>2</b> (5 μM)  | 80.49 ± 3.42                 |
| NAC (10 mM) + Complex <b>2</b> (10 μM) | 23.83 ± 1.44                 |
| Complex <b>2</b> (5 μM)                | 62.94 ± 3.95                 |
| Complex <b>2</b> (10 μM)               | 14.63 ± 3.55                 |
